# Supplementary material
Source: Springer Nature journal article supplement (https://www.springermedizin.de/resource/supplementary/12913_2006_368_MOESM2_ESM.pdf/9535028)
Supplement: MOESM2 [file 9535028]

| Before index admission | During index admission | After index admission |                    |
|------------------------|------------------------|-----------------------|--------------------|
|                        | 0 $\longrightarrow$ X  |                       | <b>AE included</b> |
|                        | 0 $\longrightarrow$    | $\longrightarrow$ X   | <b>AE included</b> |
| 0 $\longrightarrow$    | $\longrightarrow$ X    |                       | <b>AE included</b> |
| 0 $\longrightarrow$ X  |                        |                       | AE excluded        |
| 0 $\longrightarrow$    | $\longrightarrow$      | $\longrightarrow$ X   | AE excluded        |
|                        |                        | 0 $\longrightarrow$ X | AE excluded        |
